# Supplementary material for: Development of a selective and highly sensitive fluorescence assay for nucleoside triphosphate diphosphohydrolase1 (NTPDase1, CD39)
Source: Royal Society of Chemistry journal article supplement (doi:10.1039/c8an01108g), 2018-01-01
Supplement: c8an01108g1.pdf [file c8an01108g1.pdf]

## Supporting Information

### Development of a selective and highly sensitive fluorescence assay for nucleoside triphosphate diphosphohydrolase1 (NTPDase1, CD39)

Sang-Yong Lee,<sup>a,\*</sup> Xihuan Luo,<sup>a</sup> Vigneshwaran Namasivayam,<sup>a</sup> Jennifer Geiss,<sup>a</sup> Salahuddin Mirza,<sup>a</sup> Julie Pelletier,<sup>b</sup> Holger Stephan,<sup>c</sup> Jean Sévigny,<sup>b,d</sup> and Christa E. Müller<sup>a</sup>

<sup>a</sup> PharmaCenter Bonn, Pharmaceutical Institute, Pharmaceutical Chemistry I, University of Bonn, An der Immenburg 4, D-53121 Bonn, Germany

<sup>b</sup> Centre de Recherche du CHU de Québec – Université Laval, Québec City, QC, Canada

<sup>c</sup> Institute of Radiopharmaceutical Cancer Research, Helmholtz-Zentrum Dresden - Rossendorf, Bautzner Landstrasse 400, 01328 Dresden, Germany

<sup>d</sup> Département de Microbiologie-Inféctiologie et d'Immunologie, Faculté de Médecine, Université Laval, Québec City, QC, Canada

\* Correspondence: Dr. Sang-Yong Lee, PharmaCenter Bonn, Pharmaceutical Sciences Bonn (PSB), Pharmaceutical Institute, Pharmaceutical Chemistry I, University of Bonn, An der Immenburg 4, D-53121 Bonn, Germany.

**E-mail:** s6saleee@uni-bonn.de, **Fax:** +49-228-73-2567

#### Table of contents

|                                                                                                                                      |     |
|--------------------------------------------------------------------------------------------------------------------------------------|-----|
| <b>Fig. S1.</b> CE chromatograms with different incubation times for the hydrolysis of PSB-170621A to its enzyme product PSB-170621B | p.2 |
| <b>Fig. S2.</b> LC-MS chromatogram of PSB-170621B                                                                                    | p.2 |
| <b>Fig. S3.</b> Calibration curves for the forward and reverse operation                                                             | p.3 |
| <b>Fig. S4.</b> Structural formulae of the investigated enzyme inhibitors                                                            | p.3 |
| <b>Table S1.</b> Kinetic data of PSB-170621A at different ectonucleotidases                                                          | p.4 |

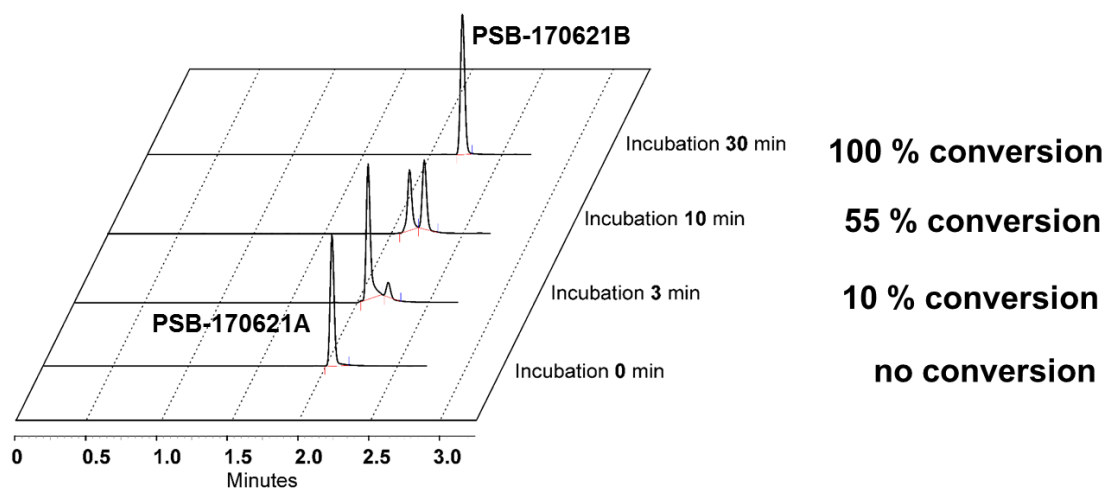

**Fig. S1.** CE chromatograms with different incubation times for the hydrolysis of PSB-170621A to its enzyme product PSB-170621B. The separation conditions for the reverse operation were: 50 mM phosphate buffer (pH 6.5), effective capillary length of 10 cm x 50  $\mu$ m (id), electrokinetic injection (6 kV, 30 s), separation at 15 kV and detection at 488 nm (excitation) and 520 nm (emission). The samples were diluted 100-fold with reaction buffer before CE measurements.

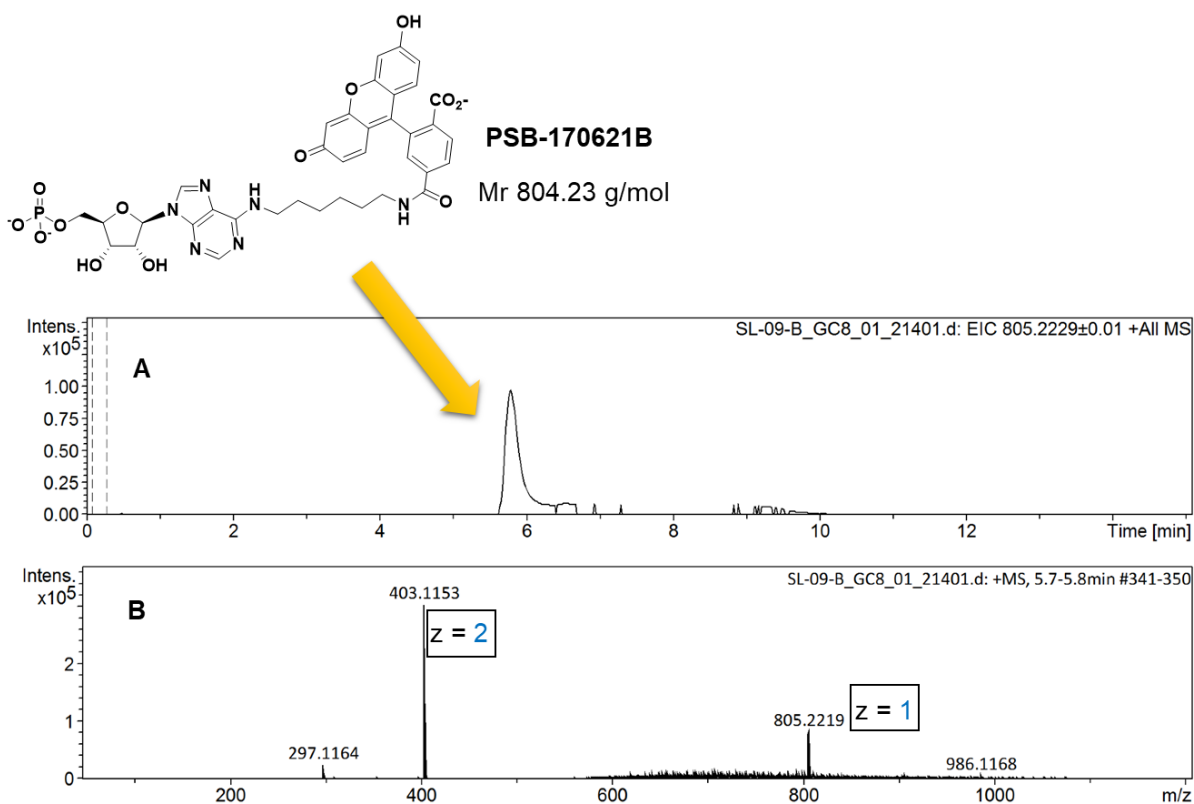

**Fig. S2.** LC-MS chromatogram of PSB-170621B. (A) Only one peak with a retention time of 5.8 min was observed in the UV/VIS chromatogram, (B) Two M/z values were obtained for the single peak in the UV/VIS chromatogram (M/z 805,2219 with  $z = 1$  and M/z 403,1153 with  $z = 2$ ).

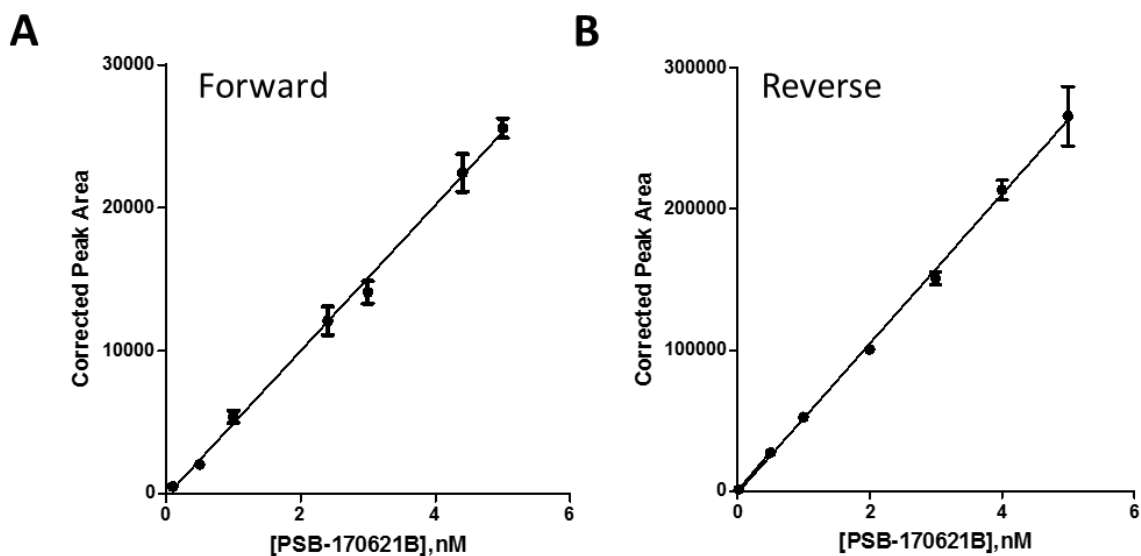

**Fig. S3.** Calibration curves for the forward operation (A) and the reverse operation (B).

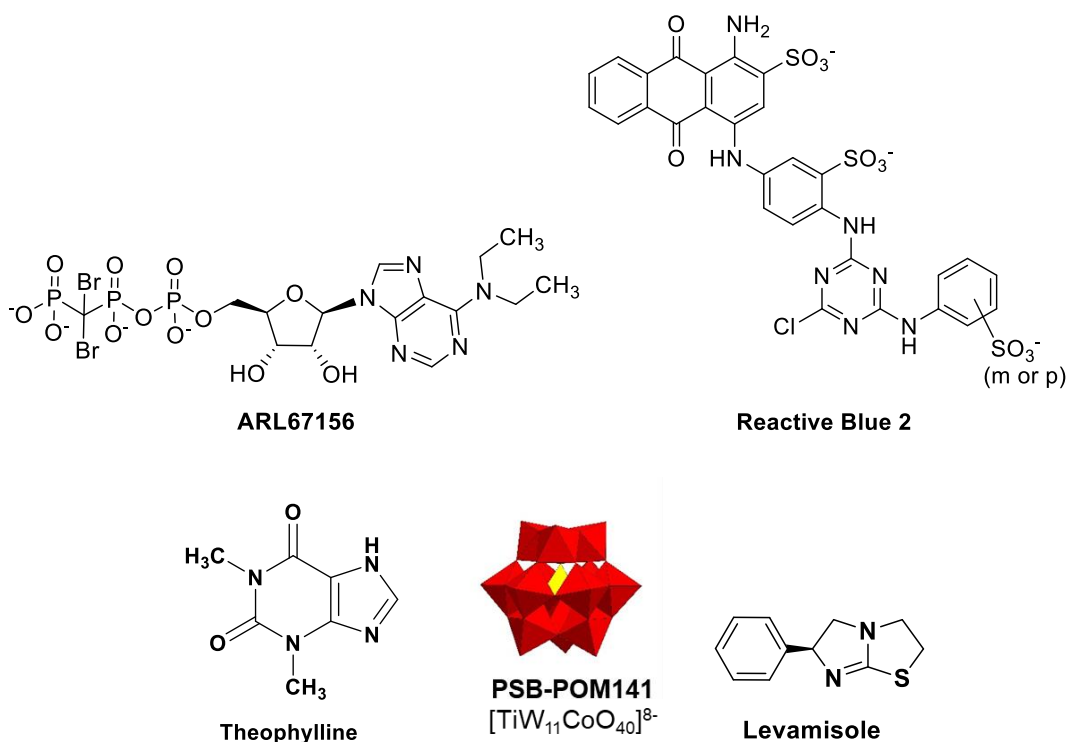

**Fig. S4.** Structural formulae of the investigated inhibitors.

**Table S1.** Kinetic data of PSB-170621A at different ectonucleotidases

|                                                        | NTPDases |          |          |          | NPPs |      | APs  |
|--------------------------------------------------------|----------|----------|----------|----------|------|------|------|
|                                                        | NTPDase1 | NTPDase2 | NTPDase3 | NTPDase8 | NPP1 | NPP3 | TNAP |
| $K_m$ ( $\mu\text{M}$ )                                | 19.6     | 55.5     | 13.3     | 105      | 37.5 | 47.6 | 12.5 |
| $k_{cat}$ ( $10^{-3} \times \text{s}^{-1}$ )           | 119      | 4.94     | 22.5     | 38.7     | 1.99 | 1.05 | 24.8 |
| $k_{cat}/K_m$ ( $\text{M}^{-1} \times \text{s}^{-1}$ ) | 6070     | 89.0     | 1690     | 369      | 53.1 | 22.1 | 1980 |
